# Supplementary material for: Turn-on fluorescence and photodynamic activity of β-(1,3-1,6)-D-glucan-complexed porphyrin derivatives inside HeLa cells
Source: Royal Society of Chemistry journal article supplement (doi:10.1039/c9pp00208a), 2019-11-12
Supplement: c9pp00208a1.pdf [file c9pp00208a1.pdf]

## Electronic Supplementary Information

### **Turn-on fluorescence and photodynamic activity of $\beta$ -(1,3-1,6)-D-glucan-complexed porphyrin derivative inside HeLa cells**

S. Hino, R. Funada, K. Sugikawa, K. Koumoto, T. Suzuki, T.  
Nagasaki and A. Ikeda\*

## Experimental section

**Materials:**  $\beta$ -1,3-Glucan was used after purification from black yeast (*Aureobasidium pullulans*). 9,10-Anthracenediyl-bis(methylene)dimalonic acid (ABDA) was purchased from Sigma-Aldrich (St Louis, MO, USA). Compounds **1**, **2**, nitroblue tetrazolium (NBT), nicotinamide adenine dinucleotide (NADH) and 1,2-dimyristoyl-*sn*-glycero-3-phosphocholine (DMPC) were purchased from Tokyo Chemical Industry Co., Ltd. (Tokyo, Japan). Trimethyl- $\beta$ -cyclodextrin (TMe- $\beta$ -CDx) was purchased from Wako Pure Chemical Industries Ltd. (Tokyo, Japan). 1,1'-dioctadecyl-3,3,3',3'-tetramethylindocarbocyanine (Dil) was obtained from Molecular Probes, Inc. (Eugene, OR, USA).

**Preparation of  $\beta$ -1,3-Glucan-Complexed Porphyrin Derivatives by HSVM Method:**  $\beta$ -1,3-Glucan-complexed porphyrin derivatives **1** or **2** were prepared using a mechanochemical high-speed vibration milling (HSVM) apparatus.<sup>12,13</sup> Porphyrin derivatives **1** or **2** (2.0  $\mu$ mol) and  $\beta$ -1,3-glucan (10.0 mg) were weighed into agate capsule together with mixing balls. The materials were mixed by high-speed vibration milling technique for 20 min. The mixtures were dissolved in water (2.0 mL) and sonicated using an ultrasonic bath (180 W, 42 kHz, 5510 Ultrasonic cleaner; Branson Ultrasonic Corp., Danbury, CT, USA) for 2 h. Samples were centrifuged for 20 min at 4500 rpm to remove the non-dispersed porphyrin derivatives.

**Determination of Concentrations of Porphyrin Derivatives in  $\beta$ -1,3-Glucan-Complexed Porphyrin Derivatives:** After centrifugation of the suspension prepared by the HSVM method, the supernatant solution and precipitate were separated. After dilution of the supernatant solution in 1/10 by water, the solution (1.0 mL) containing  $\beta$ -1,3-glucan-complexed **1** or **2** was lyophilised. The resulting black solid was dissolved in DMSO (1.0 mL) and its UV-vis absorption spectrum was measured. The concentrations of **1** and **2** were calculated to be 57.0 and 48.5  $\mu$ M in DMSO using the molecular extinction coefficients for **1** and **2** of  $\epsilon_{419} = 5.80 \times 10^5$  and  $\epsilon_{439} = 1.27 \times 10^5 \text{ dm}^3 \text{ mol}^{-1} \text{ cm}^{-1}$ , respectively. The initial concentrations of **1** and **2** in  $\beta$ -1,3-glucan-complexed **1** and **2**, as determined by measuring the absorbance of the solutions at 427 and 435 nm, respectively (molecular extinction

coefficients for **1** and **2** of  $\epsilon_{427} = 1.78 \times 10^5$  and  $\epsilon_{435} = 1.31 \times 10^5 \text{ dm}^3 \text{ mol}^{-1} \text{ cm}^{-1}$ , respectively), were 570 and 485  $\mu\text{M}$  in water (1.0 mL). In contrast, the precipitate after centrifugation was dissolved in DMSO- $d_6$  and its  $^1\text{H}$  NMR spectrum was obtained. As peaks assignable to  $\beta$ -1,3-glucan were not observed, all  $\beta$ -1,3-glucan had been dissolved in water. Therefore, the concentration of  $\beta$ -1,3-glucan in  $\beta$ -1,3-glucan-complexed **1** or **2** was determined to be  $10.0 \text{ g dm}^{-3}$ .

**Generation Ability of Reactive Oxygen Species:** The singlet oxygen ( $^1\text{O}_2$ ) generated as a consequence of the ABDA bleaching method was detected according to a reported method.<sup>6,7,11</sup> ABDA was used as a DMSO solution ( $[\text{ABDA}] = 2.5 \text{ mM}$ ). The DMSO solution of ABDA (30  $\mu\text{L}$ ) was mixed with the aqueous solution of  $\beta$ -1,3-glucan-complexed porphyrin derivatives **1** or **2** (2970  $\mu\text{L}$ ). The concentrations of ABDA in the mixture were determined to be 25  $\mu\text{M}$ . Oxygen gas was bubbled through sample solutions for 15 min prior to photoirradiation to generate aerobic conditions. Photoirradiation was achieved using a xenon lamp (SX-UID500X, 500 W; Ushio Inc., Tokyo, Japan) equipped with a long-pass filter with cut-off at 620 nm. The filter was cooled by passing it through a water filter. The power of the light was  $16 \text{ mW cm}^{-2}$  (over 620 nm) at the sample level.

**Photodynamic Activity of HeLa Cells:** HeLa cells were maintained in minimum essential medium (Gibco; Life Technologies Corp., Grand Island, NY, USA) supplemented with 10% fetal bovine serum at 37 °C in 5%  $\text{CO}_2$ . For experiments intended to determine the photodynamic activities of  $\beta$ -1,3-glucan-complexed porphyrin derivatives **1** or **2**, the cells were seeded into 48-well culture plates at a density of  $8.55 \times 10^4$  cells per well. After growing for 24 h, the cells were incubated with  $\beta$ -1,3-glucan-complexed porphyrin derivatives **1** or **2** for 24 h under dark conditions. The cells were washed with PBS and exposed to light for 30 min at ambient temperature. Photoirradiation was achieved using a xenon lamp (MAX-301, 300 W; Asahi Spectra Co., Ltd, Tokyo, Japan) equipped with a cut-off at 610 nm. The power of the light was  $9 \text{ mW cm}^{-2}$  (610–740 nm) at the cell level. The viability of the cells was measured as the ratio (%) of viable cells in the treatment groups compared with the number

of viable cells in the untreated groups. A WST-8 assay was performed 24 h after photoirradiation using the Cell Counting Kit-8 (Dojindo Laboratories, Kumamoto, Japan), according to the manufacturer's instructions.

**Phase Contrast Images and Fluorescence Images:** Phase contrast and fluorescence images of HeLa cells were obtained using an ECLIPSE Ti2-U epifluorescence microscope (Nikon Corp., Tokyo, Japan) equipped with a 40 × objective lens. Fluorescent images were recorded using a Nikon DS-Fi3 CMOS digital camera under irradiation of an excitation light beam from a mercury lamp through an optical filter (G-2A, Nikon).

**Preparation of Liposomes, Lipid-Membrane-Incorporated C<sub>60</sub> (LMIC<sub>60</sub>) and DiI (DMPC-DiI).** A mixture of DMPC (6.78 mg, 10.0 μmol) was dissolved in 10 mL chloroform. The solvent was evaporated under a gentle stream of nitrogen gas, followed by a period of evaporation under vacuum to remove any trace solvent. The resulting thin lipid films were hydrated on the wall of the vial above the phase-transition temperature with an appropriate volume. The hydrated materials were subjected to eight freeze-thaw cycles (−195 and 50 °C) to yield unilamellar vesicles, which were extruded 11 times through 0.1 μm pores using a LiposoFast miniextruder from Avestin (Ottawa, Canada) above the phase-transition temperature. LMIC<sub>60</sub> and DMPC-DiI were prepared according to previous reports.<sup>19,S1</sup>

**Preparation of Giant Unilamellar Vesicles (GUVs).** GUVs were prepared by the electroformation method on indium tin oxide (ITO) electrodes, which were originally designed by Angelova *et al.*<sup>S2</sup> A chloroform solution of DOPC (1.5 mM) was prepared for the electroformation of the vesicles. These conditions generally provide access to large amounts of GUVs with diameters >10 μm under appropriate conditions (see below). Twenty microliter samples of the lipid solution in chloroform were spread in a snake-like pattern without overlap over a 1.5 × 1.5 cm<sup>2</sup> surface area using a 10 μL Hamilton syringe. Following evaporation of the lipid film deposited on the ITO-coated glass under a stream of nitrogen, the electroformation chamber was assembled. The chamber consisted of two ITO-coated

coverslips fitted with a copper wire. The ITO-coverslips were configured to face each other with each strip being separated by a 3 mm thick polydimethylsiloxane (PDMS) film, which was used to seal the chamber. The assembled vesicle electroformation chamber was slowly filled with 450  $\mu$ L of deionised water. A sinusoidal AC electric field of 10 Hz and 2.0 V (rms) was applied for 20 min to form GUVs over a specific phase transition temperature ( $T_m$ ) using a thermostated observation stage (Linkam 10022/23) (30 °C).

**Fluorescence Microscopy of GUVs:** A solution of  $\beta$ -1,3-glucan-complexed porphyrin with 2 (0.1 mM, 3  $\mu$ L) was injected into the chamber in the presence of GUVs. A microscopic image was acquired using a Nikon ECLIPSE Ti2-U epifluorescence microscope (Nikon Corporation, Tokyo, Japan) equipped with a 60 $\times$  objective lens. Fluorescent images were recorded using a Nikon DS-Fi3 CMOS digital camera (Nikon Corporation, Tokyo, Japan) under the irradiation of an excitation light beam from a mercury lamp through an optical filter (G-2A, Nikon). The temperature of the sample was maintained using a thermostated observation stage (Linkam 10022/23).

## References

- S1 A. Ikeda, T. Mae, M. Ueda, K. Sugikawa, H. Shigeto, H. Funabashi, A. Kuroda and M. Akiyama, *Chem. Comm.*, 2017, **53**, 2966–2969.
- S2 M. I. Angelova and D. Dimitrov, *Faraday Discuss. Chem. Soc.*, 1986, **81**, 303–311.

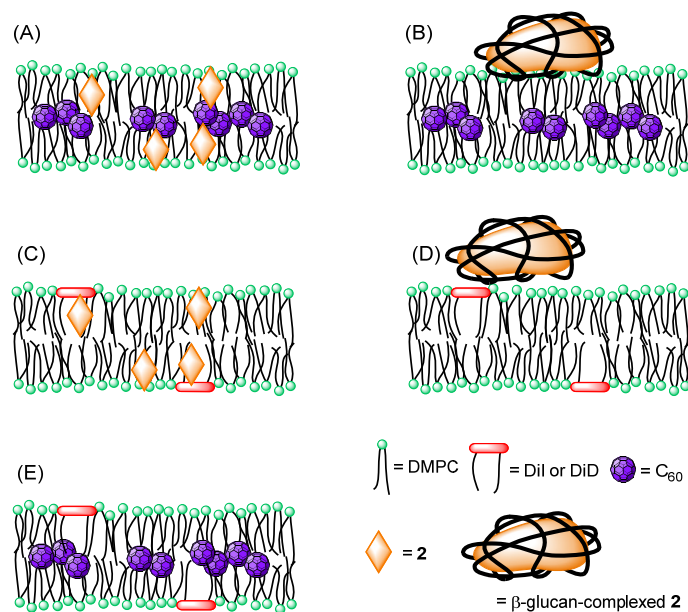

**Scheme S1** Schematic illustration of (A) **2** incorporated in LMIC<sub>60</sub>, (B) β-1,3-glucan-complexed **2** adsorbed onto LMIC<sub>60</sub>, (C) **2** incorporated in LMIDil or LMIDiD, (D) β-1,3-glucan-complexed **2** adsorbed onto LMIDil or LMIDiD and (E) LMIDil-C<sub>60</sub> or LMIDiD-C<sub>60</sub>.

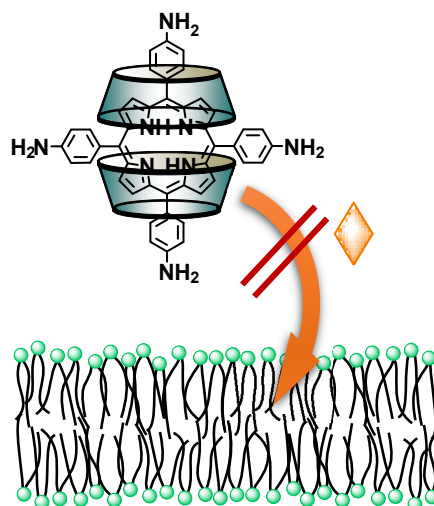

**Scheme S2** Schematic illustration of the exchange reaction from TMe-β-CDx-complexed **2** to DMPC-liposome.

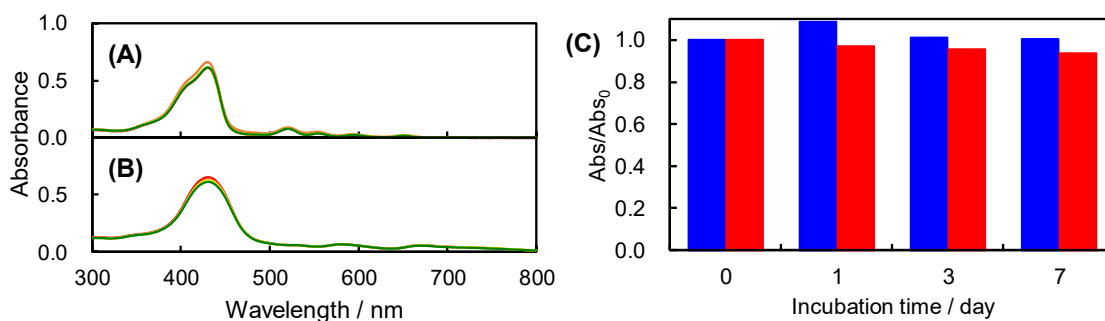

**Fig. S1** UV-Vis absorption spectra of (A)  $\beta$ -1,3-glucan-complexed **1** and (B)  $\beta$ -1,3-glucan-complexed **2** with incubation times of 0 (red line), 1 (orange line), 3 (yellow line) and 7 (green line) d at 25 °C (1 mm cell, [**1** or **2**] = 50  $\mu$ M). (C) Changes in the absorption at  $\lambda_{\max}$  of  $\beta$ -1,3-glucan-complexed **1** (blue bar) and  $\beta$ -1,3-glucan-complexed **2** (red bar) with incubation times of 0, 1, 3, and 7 d.

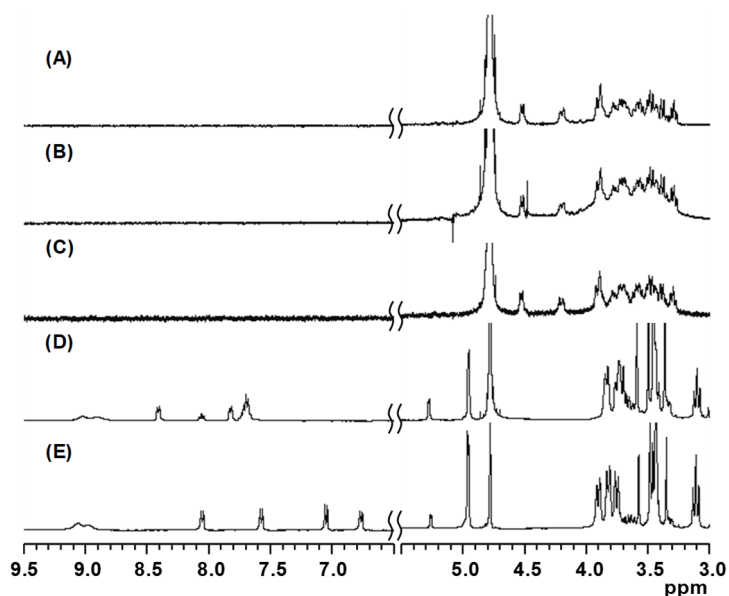

**Fig. S2** Partial  $^1\text{H}$  NMR spectra of (A)  $\beta$ -1,3-glucan only and  $\beta$ -1,3-glucan-complexed (B) **1** and (C) **2**, and TMe- $\beta$ -CDx-complexed (D) **1** and (E) **2** in  $\text{D}_2\text{O}$ .

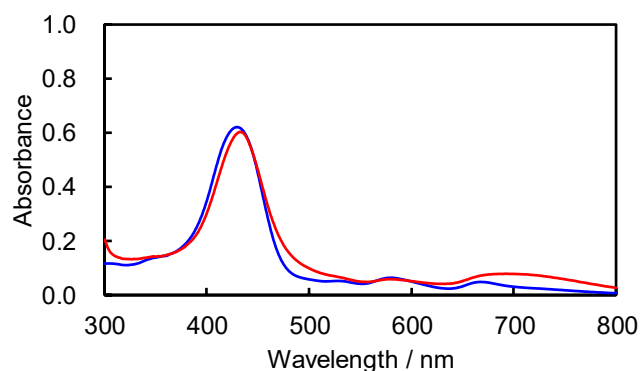

**Fig. S3** UV-Vis absorption spectra of  $\beta$ -1,3-glucan-complexed **2** treated with (red line) and without (blue line) the DNA solution ([DNA] = 100  $\mu$ g/mL) for 1 min at ambient temperature. All absorption spectra were measured in H<sub>2</sub>O at 25 °C.

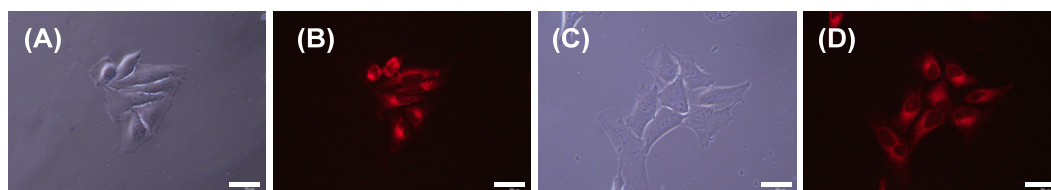

**Fig. S4** Phase contrast (A and C) and fluorescence (B and D) images of HeLa cells after treatment (A and B) without and (C and D) with 10 mM ammonium chloride for 1 h at 37 °C and then  $\beta$ -1,3-glucan-complexed porphyrin derivatives **2** for 24 h at 37 °C. The scale bars represent 20  $\mu$ m.



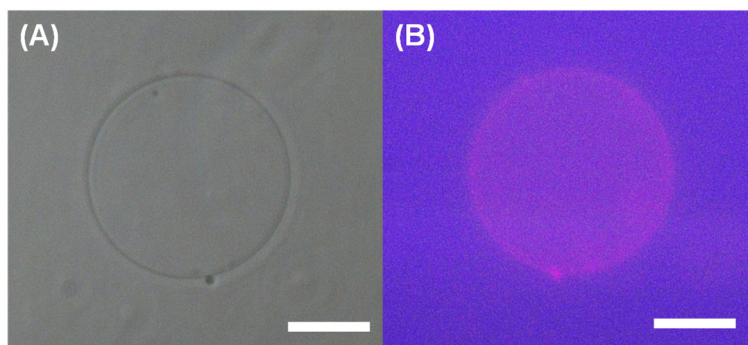

**Fig. S5** (A) Phase contrast and (B) fluorescence images of the GUVs consisting of 1,2-dioleoyl-*sn*-glycero-3-phosphocholine (DOPC) after treatment with  $\beta$ -1,3-glucan-complexed **2** for 30 min at 37 °C. The scale bar represents 10  $\mu$ m.

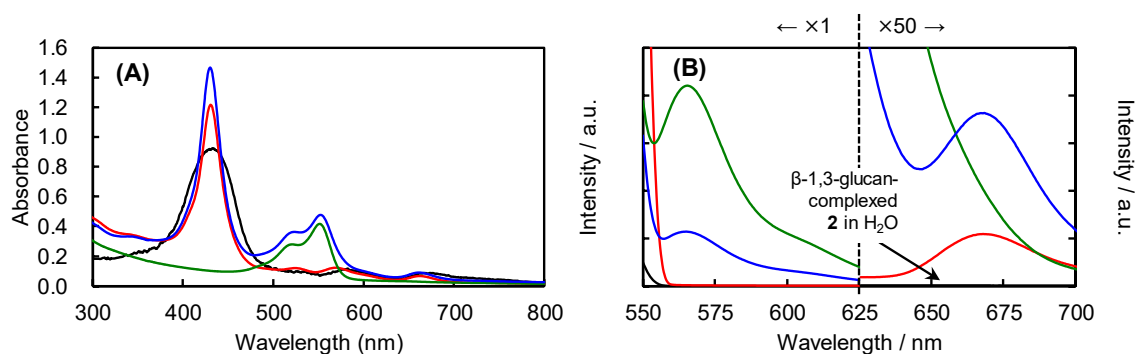

**Fig. S6.** (A) UV-Vis absorption spectra and (B) fluorescence spectra of  $\beta$ -1,3-glucan-complexed **2** in H<sub>2</sub>O (black line), 1 mM DMPC liposome solution treated for 2 h at 37 °C (red line), DMPC-Dil solution ([Dil] = 5  $\mu$ M, [DMPC] = 1 mM) treated for 2 h at 37 °C (blue line) and DMPC-Dil solution only ([Dil] = 5  $\mu$ M, [DMPC] = 1 mM) (green line). Excitation wavelength: 540 nm. All absorption spectra were measured in H<sub>2</sub>O at 25 °C. [**2**] = 5  $\mu$ M.
